# Supplementary material
Source: PubMed Central journal article supplement (PMC6766457)
Supplement: nqz150_supplemental_file.pdf [file nqz150_supplemental_file.pdf]

## Online Supporting Material

### **Dietary patterns in midlife and cognitive impairment in late life: a prospective study in Chinese adults**

Jing Wu, PhD candidate<sup>1</sup>; Xingyue Song, PhD candidate<sup>1</sup>; Guo-Chong Chen, PhD<sup>2,3</sup>; Nithya Neelakantan, PhD<sup>2</sup>; Rob M. van Dam, PhD<sup>2,4,5</sup>; Lei Feng, MD, PhD<sup>6</sup>; Jian-Min Yuan, MD, PhD<sup>7,8</sup>; An Pan, PhD<sup>1\*</sup>; Woon-Puay Koh, MBBS, PhD<sup>9,2\*</sup>

*American Journal of Clinical Nutrition*

#### **Correspondence to:**

Woon-Puay Koh, MBBS, PhD, Duke-NUS Medical School Singapore, Singapore 169857.

Phone: +65-66013147; Fax: +65-66013147; Email: [woonpuay.koh@duke-nus.edu.sg](mailto:woonpuay.koh@duke-nus.edu.sg).

An Pan, PhD, School of Public Health, Tongji Medical College, Huazhong University of Science and Technology, Wuhan 430030, Hubei, China. Phone: +86-27-83627309; Fax: +86-27-83627309; Email: [panan@hust.edu.cn](mailto:panan@hust.edu.cn).

#### **Description of supplemental materials:**

**Supplemental Figure 1** Participant flowchart

**Supplemental Table 1** Relations of quartiles of dietary quality scores with SM-MMSE score

**Supplemental Table 2** Stratified analyses: relations of quartiles of dietary quality scores with risk of cognitive impairment

**Supplemental Table 3** Stratified analyses: relations of quartiles of dietary quality scores with SM-MMSE score

**Supplemental Table 4** Sensitivity analyses: relations of quartiles of dietary quality scores with risk of cognitive impairment

**Supplemental Table 5** Baseline characteristics of study participants in different scenarios

## Online Supporting Material

**Supplemental Figure 1** Participant flowchart

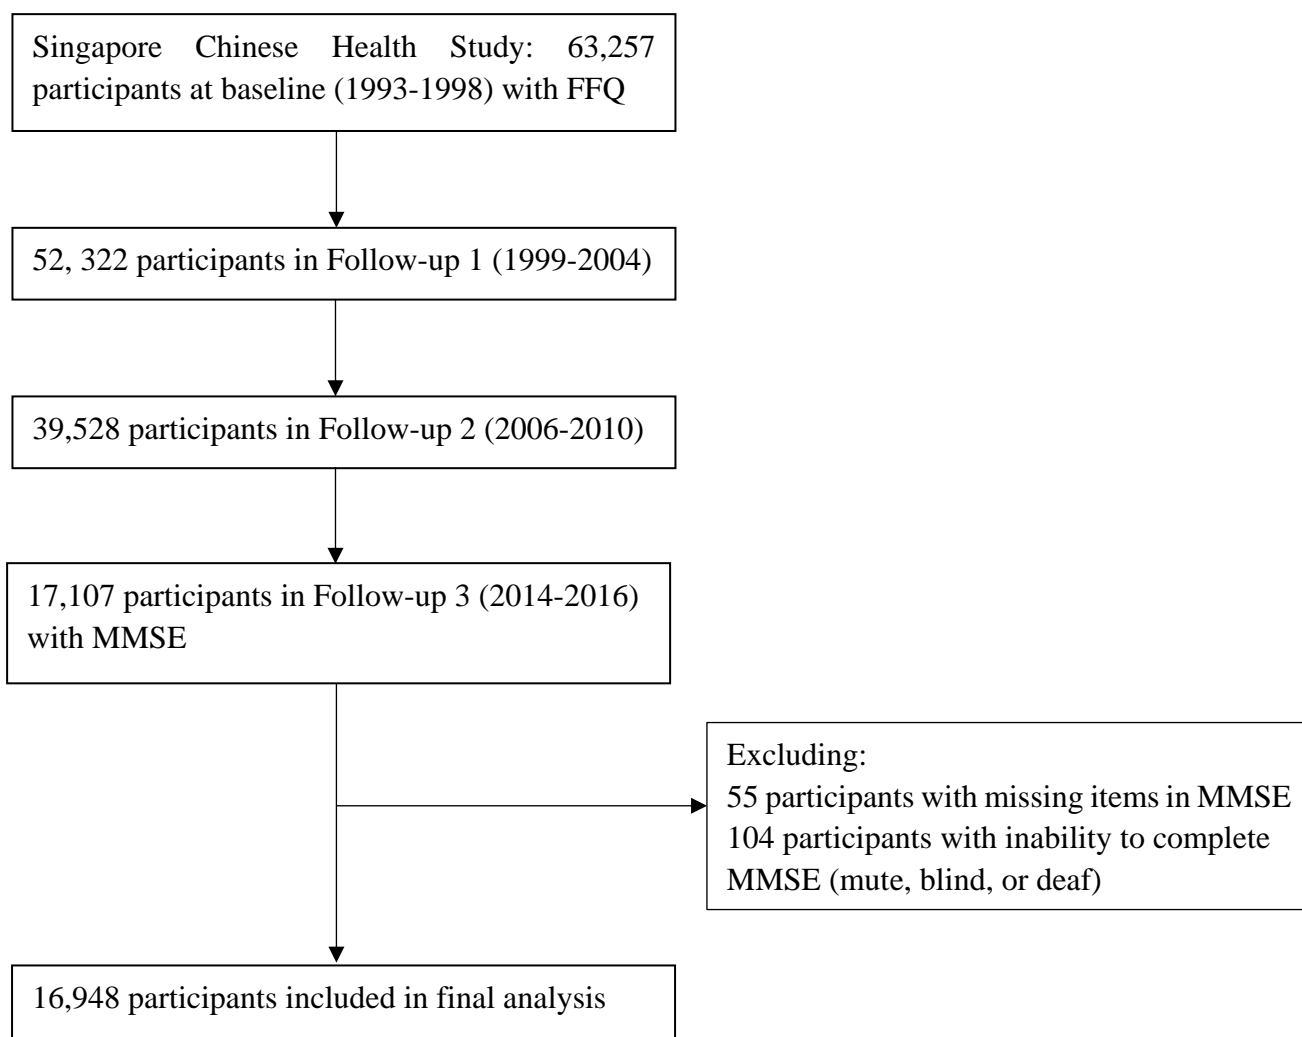

## Online Supporting Material

**Supplemental Table 1** Relations of quartiles of dietary quality scores with SM-MMSE score<sup>1</sup>

| Dietary quality scores | Mean SM-MMSE score<br>(95% CI) <sup>2</sup> | $\beta$ (95% CI)      | <i>P</i> value | <i>P</i> -trend <sup>3</sup> |
|------------------------|---------------------------------------------|-----------------------|----------------|------------------------------|
| aMED                   |                                             |                       |                | <0.001                       |
| Q1                     | 23.866 (23.573, 24.159)                     | Ref.                  |                |                              |
| Q2                     | 24.023 (23.724, 24.322)                     | 0.157 (0.026, 0.287)  | 0.02           |                              |
| Q3                     | 24.246 (23.947, 24.546)                     | 0.380 (0.246, 0.515)  | <0.001         |                              |
| Q4                     | 24.406 (24.107, 24.705)                     | 0.540 (0.404, 0.676)  | <0.001         |                              |
| DASH                   |                                             |                       |                | <0.001                       |
| Q1                     | 23.822 (23.520, 24.124)                     | Ref.                  |                |                              |
| Q2                     | 24.113 (23.811, 24.415)                     | 0.291 (0.160, 0.422)  | <0.001         |                              |
| Q3                     | 24.240 (23.936, 24.545)                     | 0.418 (0.283, 0.554)  | <0.001         |                              |
| Q4                     | 24.329 (24.025, 24.632)                     | 0.507 (0.368, 0.645)  | <0.001         |                              |
| AHEI-2010              |                                             |                       |                | <0.001                       |
| Q1                     | 23.857 (23.562, 24.152)                     | Ref.                  |                |                              |
| Q2                     | 24.081 (23.783, 24.378)                     | 0.224 (0.092, 0.356)  | <0.001         |                              |
| Q3                     | 24.229 (23.932, 24.527)                     | 0.372 (0.239, 0.506)  | <0.001         |                              |
| Q4                     | 24.310 (24.013, 24.608)                     | 0.454 (0.318, 0.589)  | <0.001         |                              |
| PDI                    |                                             |                       |                | <0.001                       |
| Q1                     | 23.917 (23.616, 24.219)                     | Ref.                  |                |                              |
| Q2                     | 24.065 (23.763, 24.367)                     | 0.148 (0.018, 0.278)  | 0.03           |                              |
| Q3                     | 24.237 (23.934, 24.541)                     | 0.320 (0.186, 0.454)  | <0.001         |                              |
| Q4                     | 24.241 (23.935, 24.547)                     | 0.324 (0.182, 0.466)  | <0.001         |                              |
| hPDI                   |                                             |                       |                | <0.001                       |
| Q1                     | 23.918 (23.614, 24.221)                     | Ref.                  |                |                              |
| Q2                     | 24.032 (23.729, 24.335)                     | 0.115 (-0.020, 0.249) | 0.09           |                              |
| Q3                     | 24.186 (23.884, 24.487)                     | 0.268 (0.131, 0.405)  | <0.001         |                              |
| Q4                     | 24.268 (23.963, 24.572)                     | 0.350 (0.206, 0.494)  | <0.001         |                              |

<sup>1</sup> Abbreviations: AHEI, alternative Healthy Eating Index; aMED, Alternate Mediterranean Diet score; CI, confidence interval; DASH, Dietary Approaches to Stop Hypertension; hPDI, healthful plant-based diet index; PDI, plant-based diet index; Q, quartile; SM-MMSE, Singapore Modified Mini-Mental State Examination.

<sup>2</sup> The multivariable-adjusted model was adjusted for age at cognitive status measurement, year of baseline interview, sex, dialect group, marital status, and education level, smoking status, physical activity, sleep duration, body mass index, total energy intake, baseline history of hypertension, diabetes, cardiovascular disease, and cancer. Analyses for the DASH, PDI and hPDI indexes were additionally adjusted for alcohol drinking, and analyses for the aMED, DASH and AHEI-2010 were additionally adjusted for tea intake and coffee intake.

<sup>3</sup> Tests for a linear trend were calculated by fitting median scores for quartiles as continuous variables in generalized linear models.



## Online Supporting Material

|                            |      |                   |                   |                   |        |                   |      |
|----------------------------|------|-------------------|-------------------|-------------------|--------|-------------------|------|
| Men                        | 1.00 | 0.83 (0.69, 1.01) | 0.72 (0.58, 0.88) | 0.71 (0.57, 0.89) | <0.001 | 0.90 (0.83, 0.97) |      |
| Women                      | 1.00 | 0.86 (0.73, 1.02) | 0.75 (0.63, 0.89) | 0.72 (0.61, 0.86) | <0.001 | 0.89 (0.83, 0.95) |      |
| Education level            |      |                   |                   |                   |        |                   | 0.85 |
| No formal education        | 1.00 | 0.81 (0.63, 1.05) | 0.62 (0.47, 0.82) | 0.74 (0.56, 0.98) | 0.01   | 0.88 (0.79, 0.98) |      |
| Primary school             | 1.00 | 0.94 (0.78, 1.14) | 0.80 (0.66, 0.97) | 0.71 (0.58, 0.88) | <0.001 | 0.89 (0.83, 0.96) |      |
| Secondary school or higher | 1.00 | 0.75 (0.60, 0.93) | 0.70 (0.56, 0.89) | 0.69 (0.55, 0.87) | 0.004  | 0.88 (0.82, 0.96) |      |
| Body mass index            |      |                   |                   |                   |        |                   | 0.59 |
| <23 kg/m <sup>2</sup>      | 1.00 | 0.89 (0.74, 1.08) | 0.81 (0.67, 0.99) | 0.81 (0.67, 0.99) | 0.03   | 0.93 (0.86, 0.99) |      |
| ≥23 kg/m <sup>2</sup>      | 1.00 | 0.81 (0.68, 0.95) | 0.67 (0.56, 0.80) | 0.63 (0.53, 0.76) | <0.001 | 0.85 (0.80, 0.91) |      |
| Baseline hypertension      |      |                   |                   |                   |        |                   | 0.32 |
| No                         | 1.00 | 0.85 (0.74, 0.98) | 0.70 (0.61, 0.82) | 0.68 (0.58, 0.79) | <0.001 | 0.87 (0.82, 0.92) |      |
| Yes                        | 1.00 | 0.82 (0.62, 1.09) | 0.82 (0.62, 1.09) | 0.85 (0.64, 1.13) | 0.37   | 0.96 (0.86, 1.06) |      |
| Baseline diabetes          |      |                   |                   |                   |        |                   | 0.16 |
| No                         | 1.00 | 0.85 (0.74, 0.96) | 0.71 (0.62, 0.81) | 0.69 (0.60, 0.79) | <0.001 | 0.87 (0.83, 0.92) |      |
| Yes                        | 1.00 | 0.78 (0.44, 1.39) | 1.10 (0.63, 1.91) | 1.08 (0.62, 1.88) | 0.49   | 1.08 (0.90, 1.31) |      |
| AHEI-2010                  |      |                   |                   |                   |        |                   |      |
| Age at baseline            |      |                   |                   |                   |        |                   | 0.61 |
| <55 years old              | 1.00 | 0.86 (0.71, 1.05) | 0.86 (0.71, 1.04) | 0.75 (0.61, 0.91) | 0.005  | 0.89 (0.83, 0.95) |      |
| ≥55 years old              | 1.00 | 0.89 (0.75, 1.05) | 0.75 (0.63, 0.89) | 0.76 (0.64, 0.90) | <0.001 | 0.90 (0.84, 0.96) |      |
| Sex                        |      |                   |                   |                   |        |                   | 0.07 |
| Men                        | 1.00 | 0.77 (0.63, 0.95) | 0.86 (0.70, 1.05) | 0.79 (0.64, 0.97) | 0.04   | 0.92 (0.85, 0.99) |      |
| Women                      | 1.00 | 0.94 (0.80, 1.11) | 0.77 (0.65, 0.91) | 0.73 (0.62, 0.87) | <0.001 | 0.88 (0.82, 0.94) |      |
| Education level            |      |                   |                   |                   |        |                   | 0.79 |
| No formal education        | 1.00 | 1.05 (0.82, 1.35) | 0.74 (0.57, 0.97) | 0.77 (0.57, 1.04) | 0.02   | 0.86 (0.77, 0.96) |      |
| Primary school             | 1.00 | 0.94 (0.78, 1.14) | 0.86 (0.70, 1.04) | 0.76 (0.62, 0.94) | 0.006  | 0.91 (0.84, 0.98) |      |
| Secondary school or higher | 1.00 | 0.67 (0.53, 0.84) | 0.76 (0.61, 0.95) | 0.71 (0.57, 0.88) | 0.01   | 0.89 (0.83, 0.97) |      |
| Body mass index            |      |                   |                   |                   |        |                   | 0.43 |
| <23 kg/m <sup>2</sup>      | 1.00 | 0.84 (0.69, 1.01) | 0.75 (0.62, 0.91) | 0.80 (0.66, 0.97) | 0.01   | 0.92 (0.86, 0.99) |      |

## Online Supporting Material

|                             |      |                   |                   |                   |        |                   |      |
|-----------------------------|------|-------------------|-------------------|-------------------|--------|-------------------|------|
| $\geq 23$ kg/m <sup>2</sup> | 1.00 | 0.90 (0.76, 1.07) | 0.83 (0.70, 0.98) | 0.70 (0.59, 0.84) | <0.001 | 0.87 (0.81, 0.93) |      |
| Baseline hypertension       |      |                   |                   |                   |        |                   | 0.64 |
| No                          | 1.00 | 0.91 (0.79, 1.05) | 0.82 (0.70, 0.94) | 0.77 (0.66, 0.89) | <0.001 | 0.89 (0.85, 0.94) |      |
| Yes                         | 1.00 | 0.75 (0.57, 0.99) | 0.75 (0.57, 0.98) | 0.70 (0.53, 0.92) | 0.01   | 0.90 (0.81, 1.00) |      |
| Baseline diabetes           |      |                   |                   |                   |        |                   | 0.23 |
| No                          | 1.00 | 0.88 (0.78, 1.01) | 0.79 (0.69, 0.90) | 0.73 (0.64, 0.84) | <0.001 | 0.89 (0.84, 0.93) |      |
| Yes                         | 1.00 | 0.75 (0.43, 1.31) | 0.90 (0.53, 1.54) | 1.06 (0.62, 1.78) | 0.63   | 1.00 (0.83, 1.21) |      |
| <b>PDI</b>                  |      |                   |                   |                   |        |                   |      |
| Age at baseline             |      |                   |                   |                   |        |                   | 0.25 |
| <55 years old               | 1.00 | 0.75 (0.62, 0.90) | 0.65 (0.53, 0.79) | 0.75 (0.61, 0.92) | 0.002  | 0.90 (0.84, 0.97) |      |
| $\geq 55$ years old         | 1.00 | 0.99 (0.84, 1.16) | 0.84 (0.71, 1.00) | 0.88 (0.73, 1.06) | 0.08   | 0.95 (0.89, 1.01) |      |
| Sex                         |      |                   |                   |                   |        |                   | 0.69 |
| Men                         | 1.00 | 0.85 (0.70, 1.04) | 0.68 (0.55, 0.85) | 0.76 (0.61, 0.94) | 0.005  | 0.90 (0.83, 0.97) |      |
| Women                       | 1.00 | 0.88 (0.76, 1.03) | 0.80 (0.68, 0.94) | 0.86 (0.72, 1.02) | 0.04   | 0.95 (0.89, 1.01) |      |
| Education level             |      |                   |                   |                   |        |                   | 0.83 |
| No formal education         | 1.00 | 0.94 (0.74, 1.20) | 0.77 (0.59, 1.02) | 0.91 (0.67, 1.24) | 0.26   | 0.95 (0.85, 1.06) |      |
| Primary school              | 1.00 | 0.91 (0.75, 1.09) | 0.75 (0.62, 0.92) | 0.73 (0.59, 0.91) | 0.001  | 0.88 (0.82, 0.95) |      |
| Secondary school or higher  | 1.00 | 0.77 (0.61, 0.96) | 0.74 (0.59, 0.93) | 0.84 (0.67, 1.06) | 0.19   | 0.96 (0.89, 1.05) |      |
| Body mass index             |      |                   |                   |                   |        |                   | 0.18 |
| <23 kg/m <sup>2</sup>       | 1.00 | 0.76 (0.63, 0.91) | 0.70 (0.58, 0.85) | 0.81 (0.67, 0.99) | 0.02   | 0.94 (0.87, 1.01) |      |
| $\geq 23$ kg/m <sup>2</sup> | 1.00 | 0.97 (0.82, 1.15) | 0.80 (0.67, 0.96) | 0.82 (0.68, 0.99) | 0.01   | 0.92 (0.86, 0.98) |      |
| Baseline hypertension       |      |                   |                   |                   |        |                   | 0.41 |
| No                          | 1.00 | 0.83 (0.72, 0.95) | 0.74 (0.64, 0.85) | 0.76 (0.65, 0.89) | <0.001 | 0.92 (0.87, 0.98) |      |
| Yes                         | 1.00 | 1.02 (0.79, 1.33) | 0.80 (0.60, 1.07) | 1.04 (0.78, 1.40) | 0.94   | 0.93 (0.84, 1.03) |      |
| Baseline diabetes           |      |                   |                   |                   |        |                   | 0.98 |
| No                          | 1.00 | 0.87 (0.77, 0.99) | 0.75 (0.66, 0.86) | 0.82 (0.72, 0.95) | 0.001  | 0.93 (0.88, 0.98) |      |
| Yes                         | 1.00 | 0.92 (0.56, 1.49) | 0.77 (0.46, 1.27) | 0.75 (0.43, 1.31) | 0.24   | 0.89 (0.73, 1.08) |      |
| <b>hPDI</b>                 |      |                   |                   |                   |        |                   |      |

## Online Supporting Material

|                            |      |                   |                   |                   |        |                   |  |      |
|----------------------------|------|-------------------|-------------------|-------------------|--------|-------------------|--|------|
| Age at baseline            |      |                   |                   |                   |        |                   |  | 0.02 |
| <55 years old              | 1.00 | 0.96 (0.79, 1.15) | 0.73 (0.59, 0.89) | 0.78 (0.63, 0.96) | 0.005  | 0.90 (0.83, 0.96) |  |      |
| ≥55 years old              | 1.00 | 0.82 (0.68, 0.98) | 0.95 (0.79, 1.13) | 0.78 (0.65, 0.94) | 0.04   | 0.94 (0.88, 1.01) |  |      |
| Sex                        |      |                   |                   |                   |        |                   |  | 0.44 |
| Men                        | 1.00 | 0.85 (0.70, 1.02) | 0.78 (0.64, 0.96) | 0.70 (0.56, 0.88) | 0.001  | 0.90 (0.83, 0.97) |  |      |
| Women                      | 1.00 | 0.93 (0.78, 1.12) | 0.93 (0.78, 1.12) | 0.85 (0.71, 1.02) | 0.08   | 0.94 (0.89, 1.01) |  |      |
| Education level            |      |                   |                   |                   |        |                   |  | 0.66 |
| No formal education        | 1.00 | 0.99 (0.74, 1.32) | 0.96 (0.72, 1.28) | 0.86 (0.64, 1.16) | 0.28   | 0.94 (0.85, 1.05) |  |      |
| Primary school             | 1.00 | 0.85 (0.70, 1.04) | 0.82 (0.67, 1.00) | 0.73 (0.59, 0.90) | 0.004  | 0.91 (0.84, 0.98) |  |      |
| Secondary school or higher | 1.00 | 0.86 (0.69, 1.08) | 0.85 (0.68, 1.06) | 0.79 (0.63, 1.00) | 0.06   | 0.93 (0.85, 1.01) |  |      |
| Body mass index            |      |                   |                   |                   |        |                   |  | 0.36 |
| <23 kg/m <sup>2</sup>      | 1.00 | 0.82 (0.68, 1.00) | 0.89 (0.74, 1.09) | 0.83 (0.68, 1.02) | 0.15   | 0.95 (0.89, 1.03) |  |      |
| ≥23 kg/m <sup>2</sup>      | 1.00 | 0.92 (0.78, 1.10) | 0.82 (0.68, 0.98) | 0.74 (0.61, 0.89) | <0.001 | 0.90 (0.84, 0.96) |  |      |
| Baseline hypertension      |      |                   |                   |                   |        |                   |  | 0.39 |
| No                         | 1.00 | 0.90 (0.78, 1.04) | 0.83 (0.72, 0.97) | 0.79 (0.67, 0.92) | 0.002  | 0.92 (0.87, 0.97) |  |      |
| Yes                        | 1.00 | 0.79 (0.59, 1.06) | 0.93 (0.70, 1.23) | 0.76 (0.57, 1.02) | 0.14   | 0.94 (0.85, 1.04) |  |      |
| Baseline diabetes          |      |                   |                   |                   |        |                   |  | 0.46 |
| No                         | 1.00 | 0.89 (0.78, 1.02) | 0.85 (0.74, 0.98) | 0.79 (0.69, 0.91) | 0.001  | 0.92 (0.88, 0.97) |  |      |
| Yes                        | 1.00 | 0.60 (0.33, 1.07) | 0.82 (0.48, 1.40) | 0.65 (0.37, 1.14) | 0.25   | 0.95 (0.78, 1.15) |  |      |

<sup>1</sup>Abbreviations: AHEI, alternative Healthy Eating Index; aMED, Alternate Mediterranean Diet score; DASH, Dietary Approaches to Stop Hypertension; hPDI, healthful plant-based diet index; PDI, plant-based diet index; Q, quartile; SD, standard deviation.

<sup>2</sup>The multivariable-adjusted model was adjusted for age at cognitive status measurement, year of baseline interview, sex, dialect group, marital status, and education level, smoking status, physical activity, sleep duration, body mass index, total energy intake, baseline history of hypertension, diabetes, cardiovascular disease, and cancer. Analyses for the DASH, PDI and hPDI indexes were additionally adjusted for alcohol drinking, and analyses for the aMED, DASH and AHEI-2010 were additionally adjusted for tea intake and coffee intake.

<sup>3</sup>SD values are as follows: 1.67 for aMED, 4.33 for DASH, 7.32 for AHEI-2010, 5.76 for PDI, and 5.60 for hPDI.

<sup>4</sup>Tests for a linear trend were calculated by fitting median scores for quartiles as continuous variables in logistic regression models.





## Online Supporting Material

|                            |      |                       |                       |                       |        |                       |                         |
|----------------------------|------|-----------------------|-----------------------|-----------------------|--------|-----------------------|-------------------------|
| Men                        | Ref. | 0.166 (-0.016, 0.348) | 0.306 (0.110, 0.502)  | 0.389 (0.177, 0.601)  | <0.001 | 0.133 (0.060, 0.206)  | -0.150 (-0.162, -0.137) |
| Women                      | Ref. | 0.377 (0.190, 0.564)  | 0.482 (0.295, 0.668)  | 0.567 (0.381, 0.753)  | <0.001 | 0.200 (0.133, 0.266)  | -0.211 (-0.222, -0.200) |
| Education level            |      |                       |                       |                       |        |                       | 0.15                    |
| No formal education        | Ref. | 0.502 (0.155, 0.849)  | 0.790 (0.425, 1.155)  | 0.926 (0.543, 1.310)  | <0.001 | 0.351 (0.210, 0.492)  | -0.252 (-0.273, -0.231) |
| Primary school             | Ref. | 0.215 (0.007, 0.423)  | 0.419 (0.206, 0.632)  | 0.441 (0.218, 0.664)  | <0.001 | 0.181 (0.102, 0.261)  | -0.182 (-0.195, -0.169) |
| Secondary school or higher | Ref. | 0.236 (0.064, 0.408)  | 0.198 (0.022, 0.374)  | 0.295 (0.121, 0.470)  | 0.004  | 0.079 (0.018, 0.140)  | -0.147 (-0.159, -0.136) |
| Body mass index            |      |                       |                       |                       |        |                       | 0.79                    |
| <23 kg/m <sup>2</sup>      | Ref. | 0.253 (0.067, 0.439)  | 0.311 (0.120, 0.501)  | 0.382 (0.189, 0.575)  | <0.001 | 0.135 (0.066, 0.203)  | -0.175 (-0.187, -0.164) |
| ≥23 kg/m <sup>2</sup>      | Ref. | 0.317 (0.132, 0.503)  | 0.510 (0.318, 0.702)  | 0.614 (0.415, 0.814)  | <0.001 | 0.223 (0.151, 0.295)  | -0.196 (-0.208, -0.184) |
| Baseline hypertension      |      |                       |                       |                       |        |                       | 0.31                    |
| No                         | Ref. | 0.280 (0.136, 0.424)  | 0.432 (0.284, 0.581)  | 0.536 (0.384, 0.688)  | <0.001 | 0.195 (0.140, 0.249)  | -0.186 (-0.195, -0.176) |
| Yes                        | Ref. | 0.334 (0.013, 0.655)  | 0.357 (0.032, 0.682)  | 0.370 (0.033, 0.706)  | 0.06   | 0.122 (0.002, 0.242)  | -0.190 (-0.209, -0.171) |
| Baseline diabetes          |      |                       |                       |                       |        |                       | 0.76                    |
| No                         | Ref. | 0.290 (0.156, 0.423)  | 0.420 (0.283, 0.558)  | 0.519 (0.377, 0.660)  | <0.001 | 0.186 (0.135, 0.236)  | -0.188 (-0.196, -0.179) |
| Yes                        | Ref. | 0.296 (-0.417, 1.009) | 0.386 (-0.326, 1.097) | 0.214 (-0.498, 0.925) | 0.65   | 0.076 (-0.165, 0.317) | -0.168 (-0.208, -0.127) |
| AHEI-2010                  |      |                       |                       |                       |        |                       |                         |
| Age at baseline            |      |                       |                       |                       |        |                       | 0.44                    |
| <55 years old              | Ref. | 0.189 (0.041, 0.337)  | 0.283 (0.134, 0.432)  | 0.396 (0.246, 0.547)  | <0.001 | 0.145 (0.091, 0.198)  | -0.138 (-0.156, -0.120) |
| ≥55 years old              | Ref. | 0.254 (0.003, 0.506)  | 0.497 (0.243, 0.752)  | 0.505 (0.243, 0.768)  | <0.001 | 0.206 (0.111, 0.301)  | -0.211 (-0.233, -0.189) |
| Sex                        |      |                       |                       |                       |        |                       | 0.004                   |
| Men                        | Ref. | 0.354 (0.164, 0.545)  | 0.233 (0.037, 0.429)  | 0.359 (0.161, 0.556)  | 0.001  | 0.126 (0.058, 0.193)  | -0.148 (-0.161, -0.136) |
| Women                      | Ref. | 0.115 (-0.066, 0.296) | 0.437 (0.257, 0.617)  | 0.493 (0.308, 0.678)  | <0.001 | 0.203 (0.135, 0.271)  | -0.210 (-0.221, -0.199) |
| Education level            |      |                       |                       |                       |        |                       | 0.21                    |
| No formal education        | Ref. | 0.140 (-0.202, 0.481) | 0.747 (0.394, 1.100)  | 0.835 (0.438, 1.233)  | <0.001 | 0.354 (0.208, 0.501)  | -0.250 (-0.271, -0.229) |
| Primary school             | Ref. | 0.170 (-0.037, 0.378) | 0.269 (0.056, 0.482)  | 0.409 (0.191, 0.626)  | <0.001 | 0.172 (0.094, 0.250)  | -0.181 (-0.194, -0.168) |
| Secondary school or higher | Ref. | 0.359 (0.183, 0.535)  | 0.281 (0.109, 0.452)  | 0.329 (0.162, 0.496)  | 0.001  | 0.096 (0.039, 0.154)  | -0.147 (-0.158, -0.136) |
| Body mass index            |      |                       |                       |                       |        |                       | 0.67                    |
| <23 kg/m <sup>2</sup>      | Ref. | 0.184 (-0.001, 0.368) | 0.330 (0.143, 0.516)  | 0.343 (0.155, 0.531)  | <0.001 | 0.140 (0.074, 0.207)  | -0.174 (-0.186, -0.163) |

## Online Supporting Material

|                            |      |                        |                       |                       |        |                       |      |                         |
|----------------------------|------|------------------------|-----------------------|-----------------------|--------|-----------------------|------|-------------------------|
| ≥23 kg/m <sup>2</sup>      | Ref. | 0.261 (0.072, 0.449)   | 0.406 (0.216, 0.596)  | 0.555 (0.360, 0.750)  | <0.001 | 0.204 (0.134, 0.273)  |      | -0.194 (-0.206, -0.182) |
| Baseline hypertension      |      |                        |                       |                       |        |                       | 0.93 |                         |
| No                         | Ref. | 0.203 (0.058, 0.348)   | 0.352 (0.205, 0.499)  | 0.425 (0.276, 0.575)  | <0.001 | 0.170 (0.117, 0.223)  |      | -0.184 (-0.193, -0.175) |
| Yes                        | Ref. | 0.305 (-0.013, 0.622)  | 0.455 (0.139, 0.772)  | 0.568 (0.247, 0.889)  | <0.001 | 0.190 (0.074, 0.307)  |      | -0.190 (-0.209, -0.171) |
| Baseline diabetes          |      |                        |                       |                       |        |                       | 0.60 |                         |
| No                         | Ref. | 0.207 (0.073, 0.341)   | 0.374 (0.239, 0.510)  | 0.447 (0.309, 0.585)  | <0.001 | 0.173 (0.123, 0.222)  |      | -0.186 (-0.194, -0.178) |
| Yes                        | Ref. | 0.497 (-0.206, 1.201)  | 0.271 (-0.431, 0.973) | 0.521 (-0.175, 1.217) | 0.244  | 0.180 (-0.063, 0.424) |      | -0.168 (-0.209, -0.128) |
| <b>PDI</b>                 |      |                        |                       |                       |        |                       |      |                         |
| Age at baseline            |      |                        |                       |                       |        |                       | 0.55 |                         |
| <55 years old              | Ref. | 0.133 (-0.014, 0.280)  | 0.282 (0.131, 0.433)  | 0.301 (0.142, 0.459)  | <0.001 | 0.118 (0.062, 0.175)  |      | -0.137 (-0.155, -0.119) |
| ≥55 years old              | Ref. | 0.139 (-0.106, 0.384)  | 0.330 (0.077, 0.583)  | 0.308 (0.034, 0.582)  | 0.011  | 0.110 (0.014, 0.207)  |      | -0.212 (-0.234, -0.190) |
| Sex                        |      |                        |                       |                       |        |                       | 0.83 |                         |
| Men                        | Ref. | 0.178 (-0.021, 0.377)  | 0.397 (0.193, 0.601)  | 0.391 (0.180, 0.602)  | <0.001 | 0.151 (0.077, 0.224)  |      | -0.148 (-0.160, -0.135) |
| Women                      | Ref. | 0.127 (-0.043, 0.298)  | 0.260 (0.083, 0.437)  | 0.280 (0.088, 0.471)  | 0.002  | 0.101 (0.033, 0.170)  |      | -0.210 (-0.221, -0.198) |
| Education level            |      |                        |                       |                       |        |                       | 0.36 |                         |
| No formal education        | Ref. | 0.159 (-0.174, 0.493)  | 0.405 (0.048, 0.762)  | 0.208 (-0.204, 0.620) | 0.116  | 0.105 (-0.037, 0.247) |      | -0.249 (-0.270, -0.228) |
| Primary school             | Ref. | 0.157 (-0.046, 0.361)  | 0.396 (0.182, 0.610)  | 0.462 (0.233, 0.691)  | <0.001 | 0.170 (0.089, 0.251)  |      | -0.180 (-0.193, -0.167) |
| Secondary school or higher | Ref. | 0.131 (-0.044, 0.307)  | 0.147 (-0.028, 0.321) | 0.208 (0.030, 0.386)  | 0.026  | 0.077 (0.014, 0.140)  |      | -0.147 (-0.158, -0.135) |
| Body mass index            |      |                        |                       |                       |        |                       | 0.75 |                         |
| <23 kg/m <sup>2</sup>      | Ref. | 0.101 (-0.080, 0.283)  | 0.255 (0.067, 0.443)  | 0.234 (0.037, 0.432)  | 0.009  | 0.086 (0.015, 0.156)  |      | -0.174 (-0.185, -0.163) |
| ≥23 kg/m <sup>2</sup>      | Ref. | 0.195 (0.010, 0.381)   | 0.374 (0.183, 0.566)  | 0.404 (0.199, 0.608)  | <0.001 | 0.154 (0.082, 0.226)  |      | -0.193 (-0.205, -0.181) |
| Baseline hypertension      |      |                        |                       |                       |        |                       | 0.76 |                         |
| No                         | Ref. | 0.180 (0.037, 0.323)   | 0.335 (0.188, 0.482)  | 0.377 (0.220, 0.533)  | <0.001 | 0.133 (0.078, 0.189)  |      | -0.184 (-0.193, -0.174) |
| Yes                        | Ref. | 0.043 (-0.269, 0.356)  | 0.272 (-0.056, 0.600) | 0.120 (-0.220, 0.460) | 0.346  | 0.079 (-0.040, 0.199) |      | -0.188 (-0.207, -0.169) |
| Baseline diabetes          |      |                        |                       |                       |        |                       | 0.74 |                         |
| No                         | Ref. | 0.160 (0.028, 0.293)   | 0.327 (0.190, 0.464)  | 0.320 (0.175, 0.466)  | <0.001 | 0.122 (0.071, 0.174)  |      | -0.185 (-0.194, -0.177) |
| Yes                        | Ref. | -0.081 (-0.712, 0.549) | 0.174 (-0.480, 0.829) | 0.367 (-0.334, 1.069) | 0.276  | 0.119 (-0.131, 0.370) |      | -0.168 (-0.208, -0.127) |
| <b>hPDI</b>                |      |                        |                       |                       |        |                       |      |                         |

## Online Supporting Material

|                            |      |                        |                       |                       |        |                       |  |                         |
|----------------------------|------|------------------------|-----------------------|-----------------------|--------|-----------------------|--|-------------------------|
| Age at baseline            |      |                        |                       |                       |        |                       |  | 0.53                    |
| <55 years old              | Ref. | 0.059 (-0.088, 0.206)  | 0.260 (0.108, 0.413)  | 0.227 (0.067, 0.388)  | 0.001  | 0.109 (0.053, 0.165)  |  | -0.137 (-0.156, -0.119) |
| ≥55 years old              | Ref. | 0.174 (-0.092, 0.441)  | 0.217 (-0.051, 0.485) | 0.499 (0.220, 0.777)  | <0.001 | 0.154 (0.056, 0.252)  |  | -0.213 (-0.235, -0.191) |
| Sex                        |      |                        |                       |                       |        |                       |  | 0.15                    |
| Men                        | Ref. | 0.130 (-0.054, 0.315)  | 0.378 (0.183, 0.573)  | 0.299 (0.085, 0.514)  | <0.001 | 0.133 (0.059, 0.206)  |  | -0.149 (-0.161, -0.136) |
| Women                      | Ref. | 0.053 (-0.139, 0.246)  | 0.157 (-0.036, 0.351) | 0.326 (0.128, 0.523)  | <0.001 | 0.125 (0.056, 0.193)  |  | -0.210 (-0.222, -0.199) |
| Education level            |      |                        |                       |                       |        |                       |  | 0.02                    |
| No formal education        | Ref. | -0.206 (-0.588, 0.177) | 0.015 (-0.374, 0.405) | 0.442 (0.040, 0.844)  | 0.009  | 0.195 (0.053, 0.337)  |  | -0.250 (-0.272, -0.229) |
| Primary school             | Ref. | 0.214 (0.001, 0.426)   | 0.426 (0.209, 0.644)  | 0.424 (0.191, 0.656)  | <0.001 | 0.163 (0.082, 0.245)  |  | -0.181 (-0.194, -0.168) |
| Secondary school or higher | Ref. | 0.109 (-0.060, 0.277)  | 0.150 (-0.023, 0.324) | 0.159 (-0.019, 0.338) | 0.078  | 0.060 (-0.002, 0.122) |  | -0.147 (-0.158, -0.136) |
| Body mass index            |      |                        |                       |                       |        |                       |  | 0.12                    |
| <23 kg/m <sup>2</sup>      | Ref. | 0.204 (0.018, 0.390)   | 0.217 (0.025, 0.409)  | 0.264 (0.063, 0.465)  | 0.013  | 0.101 (0.030, 0.171)  |  | -0.175 (-0.186, -0.163) |
| ≥23 kg/m <sup>2</sup>      | Ref. | 0.018 (-0.175, 0.212)  | 0.314 (0.117, 0.511)  | 0.427 (0.221, 0.633)  | <0.001 | 0.164 (0.092, 0.236)  |  | -0.195 (-0.206, -0.183) |
| Baseline hypertension      |      |                        |                       |                       |        |                       |  | 0.46                    |
| No                         | Ref. | 0.129 (-0.018, 0.276)  | 0.299 (0.148, 0.450)  | 0.352 (0.193, 0.510)  | <0.001 | 0.144 (0.089, 0.200)  |  | -0.184 (-0.194, -0.175) |
| Yes                        | Ref. | 0.039 (-0.292, 0.370)  | 0.136 (-0.194, 0.466) | 0.330 (-0.012, 0.673) | 0.042  | 0.094 (-0.024, 0.212) |  | -0.189 (-0.208, -0.170) |
| Baseline diabetes          |      |                        |                       |                       |        |                       |  | 0.71                    |
| No                         | Ref. | 0.111 (-0.025, 0.248)  | 0.271 (0.131, 0.412)  | 0.333 (0.186, 0.480)  | <0.001 | 0.132 (0.080, 0.183)  |  | -0.186 (-0.195, -0.178) |
| Yes                        | Ref. | 0.087 (-0.638, 0.812)  | 0.110 (-0.593, 0.813) | 0.539 (-0.184, 1.261) | 0.128  | 0.152 (-0.093, 0.398) |  | -0.169 (-0.209, -0.128) |

<sup>1</sup>Abbreviations: AHEI, alternative Healthy Eating Index; aMED, Alternate Mediterranean Diet score; DASH, Dietary Approaches to Stop Hypertension; hPDI, healthful plant-based diet index; PDI, plant-based diet index; Q, quartile; SD, standard deviation.

<sup>2</sup>The multivariable-adjusted model was adjusted for age at cognitive status measurement, year of baseline interview, sex, dialect group, marital status, and education level, smoking status, physical activity, sleep duration, body mass index, total energy intake, baseline history of hypertension, diabetes, cardiovascular disease, and cancer. Analyses for the DASH, PDI and hPDI indexes were additionally adjusted for alcohol drinking, and analyses for the aMED, DASH and AHEI-2010 were additionally adjusted for tea intake and coffee intake.

<sup>3</sup>SD values are as follows: 1.67 for aMED, 4.33 for DASH, 7.32 for AHEI-2010, 5.76 for PDI, and 5.60 for hPDI.

<sup>4</sup>Tests for a linear trend were calculated by fitting median scores for quartiles as continuous variables in generalized linear models.

## Online Supporting Material

**Supplemental Table 4** Sensitivity analyses: relations of quartiles of dietary quality scores with risk of cognitive impairment<sup>1</sup>

| Diet quality scores          | Sensitivity analysis 1 <sup>2</sup> | Sensitivity analysis 2 <sup>3</sup> | Sensitivity analysis 3 <sup>4</sup> | Sensitivity analysis 4 <sup>5</sup> | Sensitivity analysis 5 <sup>6</sup> | Sensitivity analysis 6 <sup>7</sup> |
|------------------------------|-------------------------------------|-------------------------------------|-------------------------------------|-------------------------------------|-------------------------------------|-------------------------------------|
| <b>aMED</b>                  |                                     |                                     |                                     |                                     |                                     |                                     |
| Q1                           | 1.00                                | 1.00                                | 1.00                                | 1.00                                | 1.00                                | 1.00                                |
| Q2                           | 0.80 (0.71, 0.92)                   | 0.85 (0.75, 0.96)                   | 0.86 (0.76, 0.97)                   | 0.85 (0.75, 0.96)                   | 0.86 (0.76, 0.97)                   | 0.90 (0.81, 1.00)                   |
| Q3                           | 0.69 (0.59, 0.80)                   | 0.75 (0.66, 0.86)                   | 0.76 (0.67, 0.87)                   | 0.76 (0.66, 0.86)                   | 0.76 (0.67, 0.87)                   | 0.76 (0.68, 0.86)                   |
| Q4                           | 0.60 (0.51, 0.71)                   | 0.66 (0.58, 0.76)                   | 0.68 (0.60, 0.78)                   | 0.68 (0.59, 0.78)                   | 0.68 (0.59, 0.77)                   | 0.67 (0.60, 0.76)                   |
| <i>P</i> -trend <sup>8</sup> | <0.001                              | <0.001                              | <0.001                              | <0.001                              | <0.001                              | <0.001                              |
| <b>DASH</b>                  |                                     |                                     |                                     |                                     |                                     |                                     |
| Q1                           | 1.00                                | 1.00                                | 1.00                                | 1.00                                | 1.00                                | 1.00                                |
| Q2                           | 0.82 (0.72, 0.94)                   | 0.85 (0.74, 0.96)                   | 0.84 (0.74, 0.96)                   | 0.85 (0.75, 0.96)                   | 0.83 (0.74, 0.95)                   | 0.79 (0.71, 0.88)                   |
| Q3                           | 0.72 (0.63, 0.83)                   | 0.72 (0.63, 0.82)                   | 0.73 (0.64, 0.83)                   | 0.74 (0.65, 0.84)                   | 0.72 (0.63, 0.82)                   | 0.77 (0.68, 0.86)                   |
| Q4                           | 0.70 (0.61, 0.80)                   | 0.72 (0.63, 0.82)                   | 0.71 (0.62, 0.81)                   | 0.72 (0.63, 0.82)                   | 0.70 (0.61, 0.80)                   | 0.69 (0.61, 0.77)                   |
| <i>P</i> -trend <sup>8</sup> | <0.001                              | <0.001                              | <0.001                              | <0.001                              | <0.001                              | <0.001                              |
| <b>AHEI-2010</b>             |                                     |                                     |                                     |                                     |                                     |                                     |
| Q1                           | 1.00                                | 1.00                                | 1.00                                | 1.00                                | 1.00                                | 1.00                                |
| Q2                           | 0.88 (0.77, 1.00)                   | 0.89 (0.78, 1.01)                   | 0.88 (0.77, 1.00)                   | 0.88 (0.78, 1.00)                   | 0.87 (0.77, 0.99)                   | 0.82 (0.73, 0.91)                   |
| Q3                           | 0.80 (0.70, 0.91)                   | 0.80 (0.70, 0.91)                   | 0.80 (0.71, 0.91)                   | 0.80 (0.71, 0.91)                   | 0.79 (0.70, 0.90)                   | 0.77 (0.69, 0.86)                   |
| Q4                           | 0.74 (0.65, 0.85)                   | 0.76 (0.66, 0.86)                   | 0.76 (0.67, 0.87)                   | 0.76 (0.67, 0.87)                   | 0.75 (0.66, 0.86)                   | 0.70 (0.62, 0.78)                   |
| <i>P</i> -trend <sup>8</sup> | <0.001                              | <0.001                              | <0.001                              | <0.001                              | <0.001                              | <0.001                              |
| <b>PDI</b>                   |                                     |                                     |                                     |                                     |                                     |                                     |
| Q1                           | 1.00                                | 1.00                                | 1.00                                | 1.00                                | 1.00                                | 1.00                                |
| Q2                           | 0.86 (0.76, 0.98)                   | 0.87 (0.77, 0.98)                   | 0.88 (0.78, 0.99)                   | 0.87 (0.77, 0.99)                   | 0.88 (0.78, 1.00)                   | 0.87 (0.78, 0.97)                   |
| Q3                           | 0.75 (0.65, 0.85)                   | 0.75 (0.66, 0.86)                   | 0.76 (0.67, 0.87)                   | 0.75 (0.66, 0.86)                   | 0.76 (0.67, 0.86)                   | 0.78 (0.70, 0.87)                   |
| Q4                           | 0.81 (0.70, 0.93)                   | 0.81 (0.71, 0.93)                   | 0.84 (0.73, 0.96)                   | 0.83 (0.72, 0.95)                   | 0.83 (0.73, 0.95)                   | 0.79 (0.70, 0.89)                   |
| <i>P</i> -trend <sup>8</sup> | <0.001                              | <0.001                              | 0.002                               | 0.001                               | 0.002                               | <0.001                              |
| <b>hPDI</b>                  |                                     |                                     |                                     |                                     |                                     |                                     |

## Online Supporting Material

|                              |                   |                   |                   |                   |                   |                   |
|------------------------------|-------------------|-------------------|-------------------|-------------------|-------------------|-------------------|
| Q1                           | 1.00              | 1.00              | 1.00              | 1.00              | 1.00              | 1.00              |
| Q2                           | 0.90 (0.79, 1.03) | 0.89 (0.78, 1.01) | 0.88 (0.77, 1.00) | 0.88 (0.77, 1.00) | 0.87 (0.77, 1.00) | 0.90 (0.81, 1.01) |
| Q3                           | 0.84 (0.74, 0.97) | 0.85 (0.74, 0.97) | 0.86 (0.76, 0.98) | 0.86 (0.75, 0.98) | 0.86 (0.75, 0.98) | 0.81 (0.72, 0.91) |
| Q4                           | 0.79 (0.68, 0.91) | 0.78 (0.68, 0.90) | 0.80 (0.69, 0.91) | 0.79 (0.69, 0.91) | 0.78 (0.68, 0.90) | 0.76 (0.68, 0.86) |
| <i>P</i> -trend <sup>8</sup> | <0.001            | <0.001            | 0.002             | 0.001             | <0.001            | <0.001            |

<sup>1</sup> Abbreviations: AHEI, alternative Healthy Eating Index; aMED, Alternate Mediterranean Diet score; DASH, Dietary Approaches to Stop Hypertension; hPDI, healthful plant-based diet index; PDI, plant-based diet index; Q, quartile; SM-MMSE, Singapore-modified version of Mini-Mental State Examination.

<sup>2</sup> Sensitivity analysis 1 (n=16213): Analysis of excluding 735 participants with baseline cardiovascular disease or cancer. The multivariable-adjusted model was adjusted for age at cognitive status measurement, year of baseline interview, sex, dialect group, marital status, and education level, smoking status, physical activity, sleep duration, body mass index, total energy intake, baseline history of hypertension, diabetes. Analyses for the DASH, PDI and hPDI indexes were additionally adjusted for alcohol drinking, and analyses for the aMED, DASH and AHEI-2010 were additionally adjusted for tea intake and coffee intake.

<sup>3</sup> Sensitivity analysis 2 (n=16948): Analysis of adjusting for incident hypertension, diabetes, cardiovascular disease and cancer events. The multivariable-adjusted model was adjusted for age at cognitive status measurement, year of baseline interview, sex, dialect group, marital status, and education level, smoking status, physical activity, sleep duration, body mass index, total energy intake, incident hypertension, diabetes, cardiovascular disease and cancer events during the follow-up period. Analyses for the DASH, PDI and hPDI indexes were additionally adjusted for alcohol drinking, and analyses for the aMED, DASH and AHEI-2010 were additionally adjusted for tea intake and coffee intake.

<sup>4</sup> Sensitivity analysis 3 (n=16948): Analysis of adjusting for age at baseline instead of age at the cognitive status measurement. The multivariable-adjusted model was adjusted for age at baseline, year of baseline interview, sex, dialect group, marital status, and education level, smoking status, physical activity, sleep duration, body mass index, total energy intake, baseline history of hypertension, diabetes, cardiovascular disease, and cancer. Analyses for the DASH, PDI and hPDI indexes were additionally adjusted for alcohol drinking, and analyses for the aMED, DASH and AHEI-2010 were additionally adjusted for tea intake and coffee intake.

<sup>5</sup> Sensitivity analysis 4 (n=16948): Analysis of adjusting for housing type at follow-up 3. The multivariable-adjusted model was adjusted for age at cognitive status measurement, year of baseline interview, sex, dialect group, marital status, and education level, housing type, smoking status, physical activity, sleep duration, body mass index, total energy intake, baseline history of hypertension, diabetes, cardiovascular disease, and cancer. Analyses for the DASH, PDI and hPDI indexes were additionally adjusted for alcohol drinking, and

## Online Supporting Material

analyses for the aMED, DASH and AHEI-2010 were additionally adjusted for tea intake and coffee intake.

<sup>6</sup> Sensitivity analysis 5 (n=16736): Analysis of excluding 212 participants who had unrealistic daily energy intake at baseline. Unrealistic daily energy intake was defined as <700 or >3700 kcal/day for men and <600 or >3000 kcal/day. The multivariable-adjusted model was adjusted for age at cognitive status measurement, year of baseline interview, sex, dialect group, marital status, and education level, smoking status, physical activity, sleep duration, body mass index, total energy intake, baseline history of hypertension, diabetes, cardiovascular disease, and cancer. Analyses for the DASH, PDI and hPDI indexes were additionally adjusted for alcohol drinking, and analyses for the aMED, DASH and AHEI-2010 were additionally adjusted for tea intake and coffee intake.

<sup>7</sup> Sensitivity analysis 6 (n=16948): Analysis of using the SM-MMSE cut-off point of 23/24. The multivariable-adjusted model was adjusted for age at cognitive status measurement, year of baseline interview, sex, dialect group, marital status, and education level, smoking status, physical activity, sleep duration, body mass index, total energy intake, baseline history of hypertension, diabetes, cardiovascular disease, and cancer. Analyses for the DASH, PDI and hPDI indexes were additionally adjusted for alcohol drinking, and analyses for the aMED, DASH and AHEI-2010 were additionally adjusted for tea intake and coffee intake.

<sup>8</sup> *P* values for trend test were calculated by fitting median scores for quartiles as continuous variables in logistic regression models.

## Online Supporting Material

**Supplemental Table 5** Baseline characteristics of study participants in different scenarios

| Variables                                         | Baseline       | Follow-up 1 visit | Follow-up 2 visit | Follow-up 3 visit | Individuals who did not participated in the follow-up 3 visit | Individuals who did not participated in the follow-up 3 visit for reasons other than death |
|---------------------------------------------------|----------------|-------------------|-------------------|-------------------|---------------------------------------------------------------|--------------------------------------------------------------------------------------------|
| N                                                 | 63257          | 52322             | 39528             | 17107             | 46150                                                         | 28002                                                                                      |
| Age at baseline, mean $\pm$ SD, y                 | 56.5 $\pm$ 8.0 | 55.8 $\pm$ 7.7    | 54.8 $\pm$ 7.3    | 53.1 $\pm$ 6.3    | 57.8 $\pm$ 8.2                                                | 55.0 $\pm$ 7.4                                                                             |
| Body mass index, mean $\pm$ SD, kg/m <sup>2</sup> | 23.1 $\pm$ 3.3 | 23.1 $\pm$ 3.3    | 23.1 $\pm$ 3.2    | 23.1 $\pm$ 3.2    | 23.1 $\pm$ 3.3                                                | 23.1 $\pm$ 3.2                                                                             |
| aMED score, mean $\pm$ SD                         | 4.0 $\pm$ 1.7  | 4.0 $\pm$ 1.7     | 4.1 $\pm$ 1.7     | 4.2 $\pm$ 1.7     | 3.9 $\pm$ 1.7                                                 | 4.0 $\pm$ 1.7                                                                              |
| DASH score, mean $\pm$ SD                         | 24.1 $\pm$ 4.3 | 24.2 $\pm$ 4.3    | 24.3 $\pm$ 4.3    | 24.5 $\pm$ 4.3    | 24.0 $\pm$ 4.3                                                | 24.1 $\pm$ 4.3                                                                             |
| AHEI-2010 score, mean $\pm$ SD                    | 50.0 $\pm$ 7.3 | 50.2 $\pm$ 7.3    | 50.3 $\pm$ 7.3    | 50.8 $\pm$ 7.3    | 49.7 $\pm$ 7.3                                                | 50.0 $\pm$ 7.3                                                                             |
| PDI score, mean $\pm$ SD                          | 39.8 $\pm$ 5.8 | 39.9 $\pm$ 5.8    | 40.1 $\pm$ 5.8    | 40.4 $\pm$ 5.8    | 39.6 $\pm$ 5.8                                                | 39.9 $\pm$ 5.8                                                                             |
| hPDI score, mean $\pm$ SD                         | 45.4 $\pm$ 5.6 | 45.4 $\pm$ 5.6    | 45.4 $\pm$ 5.6    | 45.6 $\pm$ 5.6    | 45.3 $\pm$ 5.6                                                | 45.3 $\pm$ 5.6                                                                             |
| Sex (%)                                           |                |                   |                   |                   |                                                               |                                                                                            |
| Male                                              | 27954 (44.2)   | 22233 (42.5)      | 16487 (41.7)      | 7000 (40.9)       | 20954 (45.4)                                                  | 10902 (38.9)                                                                               |
| Female                                            | 35303 (55.8)   | 30089 (57.5)      | 23041 (58.3)      | 10107 (59.1)      | 25196 (54.6)                                                  | 17100 (61.1)                                                                               |
| Dialect (%)                                       |                |                   |                   |                   |                                                               |                                                                                            |
| Cantonese                                         | 29284 (46.3)   | 25322 (48.4)      | 19286 (48.8)      | 8518 (49.8)       | 20766 (45.0)                                                  | 13148 (47.0)                                                                               |
| Hokkiens                                          | 33973 (53.7)   | 27000 (51.6)      | 20242 (51.2)      | 8589 (50.2)       | 25384 (55.0)                                                  | 14854 (53.0)                                                                               |
| Marital status (%)                                |                |                   |                   |                   |                                                               |                                                                                            |
| Married                                           | 52638 (83.2)   | 44082 (84.3)      | 33867 (85.7)      | 15148 (88.5)      | 37490 (81.2)                                                  | 23397 (83.6)                                                                               |
| Separated/divorced                                | 1205 (1.9)     | 957 (1.8)         | 702 (1.8)         | 256 (1.5)         | 949 (2.1)                                                     | 618 (2.2)                                                                                  |
| Widowed                                           | 6934 (11.0)    | 5322 (10.2)       | 3486 (8.8)        | 1059 (6.2)        | 5875 (12.7)                                                   | 2846 (10.2)                                                                                |
| Never married                                     | 2480 (3.9)     | 1961 (3.7)        | 1473 (3.7)        | 644 (3.8)         | 1836 (4.0)                                                    | 1141 (4.1)                                                                                 |
| Education level (%)                               |                |                   |                   |                   |                                                               |                                                                                            |
| No formal education                               | 17333 (27.4)   | 13477 (25.8)      | 9434 (23.9)       | 3230 (18.9)       | 14103 (30.6)                                                  | 7532 (26.9)                                                                                |
| Primary School                                    | 28050 (44.3)   | 23355 (44.6)      | 17683 (44.7)      | 7669 (44.8)       | 20381 (44.2)                                                  | 12102 (43.2)                                                                               |
| Secondary school or higher                        | 17874 (28.3)   | 15490 (29.6)      | 12411 (31.4)      | 6208 (36.3)       | 11666 (25.3)                                                  | 8368 (29.9)                                                                                |

## Online Supporting Material

|                           |              |              |              |              |              |              |
|---------------------------|--------------|--------------|--------------|--------------|--------------|--------------|
| Smoking status (%)        |              |              |              |              |              |              |
| Never smokers             | 43930 (69.4) | 37572 (71.8) | 29226 (73.9) | 13287 (77.7) | 30643 (66.4) | 20974 (74.9) |
| Former smokers            | 6993 (11.1)  | 5461 (10.4)  | 3879 (9.8)   | 1569 (9.2)   | 5424 (11.8)  | 2540 (9.1)   |
| Current smokers           | 12334 (19.5) | 9289 (17.8)  | 6423 (16.2)  | 2251 (13.2)  | 10083 (21.8) | 4488 (16.0)  |
| Alcohol drinking (%)      |              |              |              |              |              |              |
| <Weekly                   | 55946 (88.4) | 46315 (88.5) | 34937 (88.4) | 15136 (88.5) | 40810 (88.4) | 24875 (88.8) |
| Weekly                    | 5106 (8.1)   | 4286 (8.2)   | 3382 (8.6)   | 1495 (8.7)   | 3611 (7.8)   | 2293 (8.2)   |
| Daily                     | 2205 (3.5)   | 1721 (3.3)   | 1209 (3.1)   | 476 (2.8)    | 1729 (3.7)   | 834 (3.0)    |
| Tea intake (%)            |              |              |              |              |              |              |
| None                      | 26156 (41.3) | 21253 (40.6) | 15827 (40.0) | 6520 (38.1)  | 19636 (42.5) | 11622 (41.5) |
| Monthly                   | 7618 (12.0)  | 6391 (12.2)  | 4864 (12.3)  | 2097 (12.3)  | 5521 (12.0)  | 3482 (12.4)  |
| Weekly                    | 15392 (24.3) | 12920 (24.7) | 9931 (25.1)  | 4476 (26.2)  | 10916 (23.7) | 6869 (24.5)  |
| Daily                     | 14091 (22.3) | 11758 (22.5) | 8906 (22.5)  | 4014 (23.5)  | 10077 (21.8) | 6029 (21.5)  |
| Coffee intake (%)         |              |              |              |              |              |              |
| None/less than daily      | 18816 (29.7) | 15468 (29.6) | 11726 (29.7) | 5207 (30.4)  | 13609 (29.5) | 8208 (29.3)  |
| 1 cup/day                 | 22803 (36.0) | 18950 (36.2) | 14244 (36.0) | 6219 (36.4)  | 16584 (35.9) | 10077 (36.0) |
| ≥2 cup/day                | 21638 (34.2) | 17904 (34.2) | 13558 (34.3) | 5681 (33.2)  | 15957 (34.6) | 9717 (34.7)  |
| Physical activity (%)     |              |              |              |              |              |              |
| <0.5 hours/week           | 42467 (67.1) | 34648 (66.2) | 25887 (65.5) | 10828 (63.3) | 31639 (68.6) | 18844 (67.3) |
| 0.5-3.9 hours/week        | 12776 (20.2) | 10935 (20.9) | 8518 (21.5)  | 3979 (23.3)  | 8797 (19.1)  | 5727 (20.5)  |
| ≥4 hours/week             | 8014 (12.7)  | 6739 (12.9)  | 5123 (13.0)  | 2300 (13.4)  | 5714 (12.4)  | 3431 (12.3)  |
| Sleep duration (%)        |              |              |              |              |              |              |
| <6 h/day                  | 6155 (9.7)   | 4934 (9.4)   | 3605 (9.1)   | 1412 (8.3)   | 4743 (10.3)  | 2568 (9.2)   |
| 6-8 h/day                 | 52702 (83.3) | 43987 (84.1) | 33549 (84.9) | 14758 (86.3) | 37944 (82.2) | 23655 (84.5) |
| >8 h/day                  | 4400 (7.0)   | 3401 (6.5)   | 2374 (6.0)   | 937 (5.5)    | 3463 (7.5)   | 1779 (6.4)   |
| Comorbidities             |              |              |              |              |              |              |
| Baseline hypertension (%) | 15054 (23.8) | 11931 (22.8) | 8442 (21.4)  | 3315 (19.4)  | 11739 (25.4) | 5948 (21.2)  |
| Baseline diabetes (%)     | 5696 (9.0)   | 4040 (7.7)   | 2568 (6.5)   | 844 (4.9)    | 4852 (10.5)  | 1708 (6.1)   |



## Online Supporting Material

|                                     |            |            |            |           |            |           |
|-------------------------------------|------------|------------|------------|-----------|------------|-----------|
| Baseline cardiovascular disease (%) | 3401 (5.4) | 2314 (4.4) | 1367 (3.5) | 427 (2.5) | 2974 (6.4) | 969 (3.5) |
| Baseline cancer (%)                 | 1936 (3.1) | 1274 (2.4) | 820 (2.1)  | 325 (1.9) | 1611 (3.5) | 541 (1.9) |

---

<sup>1</sup> Values are means  $\pm$  SD for continuous and percentages for categorical variables. Abbreviations: AHEI, alternative Healthy Eating Index; aMED, Alternate Mediterranean Diet score; DASH, Dietary Approaches to Stop Hypertension; hPDI, Healthy Diet Indicator; PDI, plant-based diet index; SD, standard deviation.
